# Supplementary material
Source: PubMed Central journal article supplement (PMC3434561)
Supplement: IAI.00381-12_zii999099742so1.pdf [file IAI.00381-12_zii999099742so1.pdf]

## SUPPLEMENTARY FIGURES

### FIGURE-S1:

*H. pylori* induces the expression of CD25, CD80, CD83, CCR7, and PDL-1 but down-regulates CD209 on DCs.

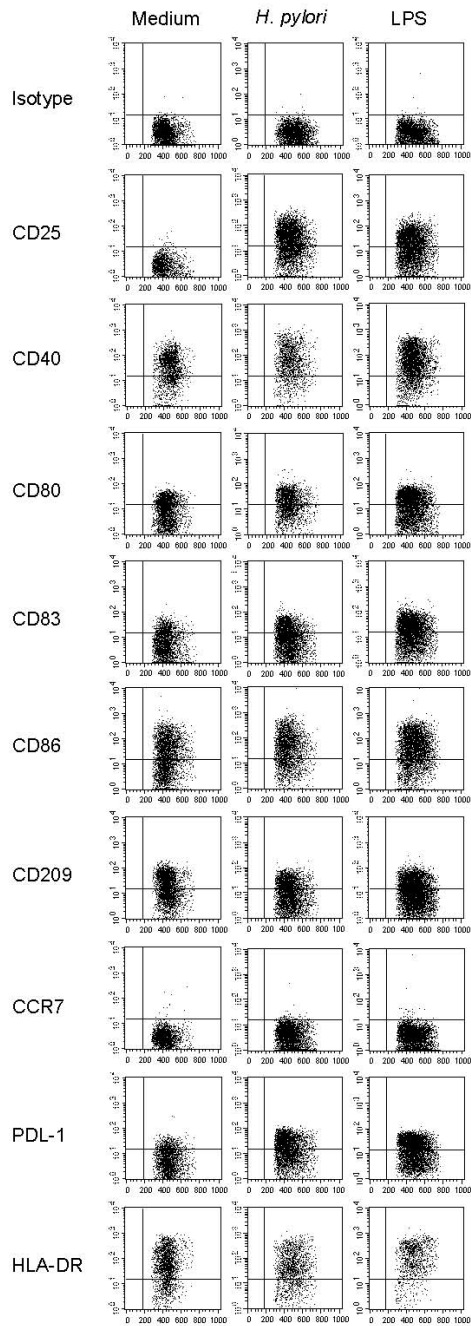

Immature DCs were infected with *H. pylori* for 1 h (MOI =10). Cells were washed, incubated for another 24 h, and surface molecule expression was determined by flow cytometry. Cells incubated in the presence of LPS (100 ng/ml) or in medium alone served as controls. One representative of at least five independent experiments (donors) is shown.

**FIGURE-S2:**

*H. pylori* induces the expression of CD14 and CD32 but downregulates CD11b and HLA-DR on M1 macrophages.

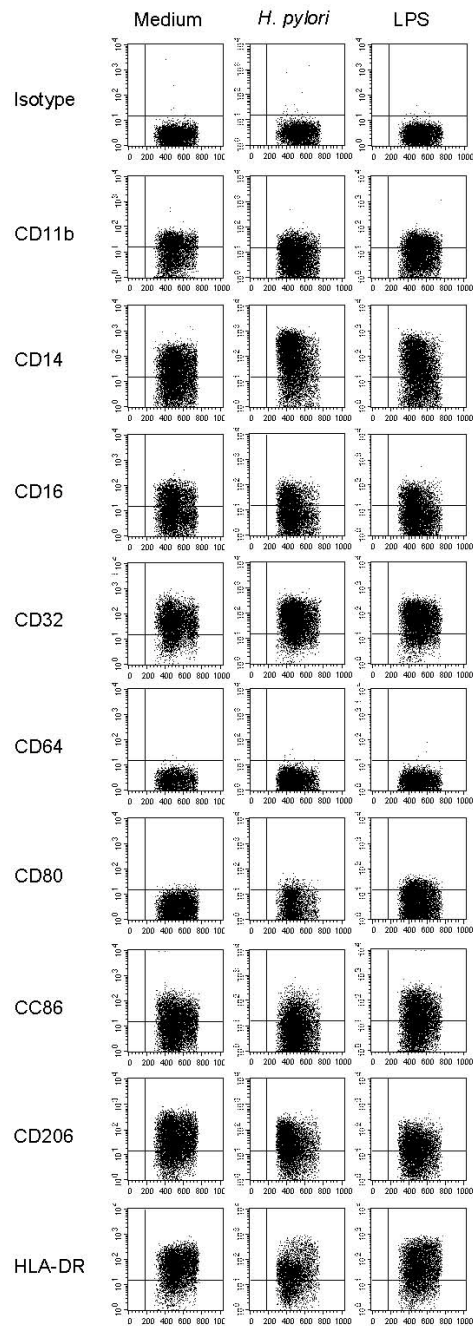

M1 macrophages were infected with *H. pylori* for 1 h (MOI =10). Cells were washed, incubated for another 24 h, and surface molecule expression was determined by flow cytometry. Cells incubated in the presence of LPS (100 ng/ml) or in medium alone served as controls. One representative of at least five independent experiments (donors) is shown.

**FIGURE-S3:**

*H. pylori* induces the expression of CD14 and CD206 on M2 macrophages.

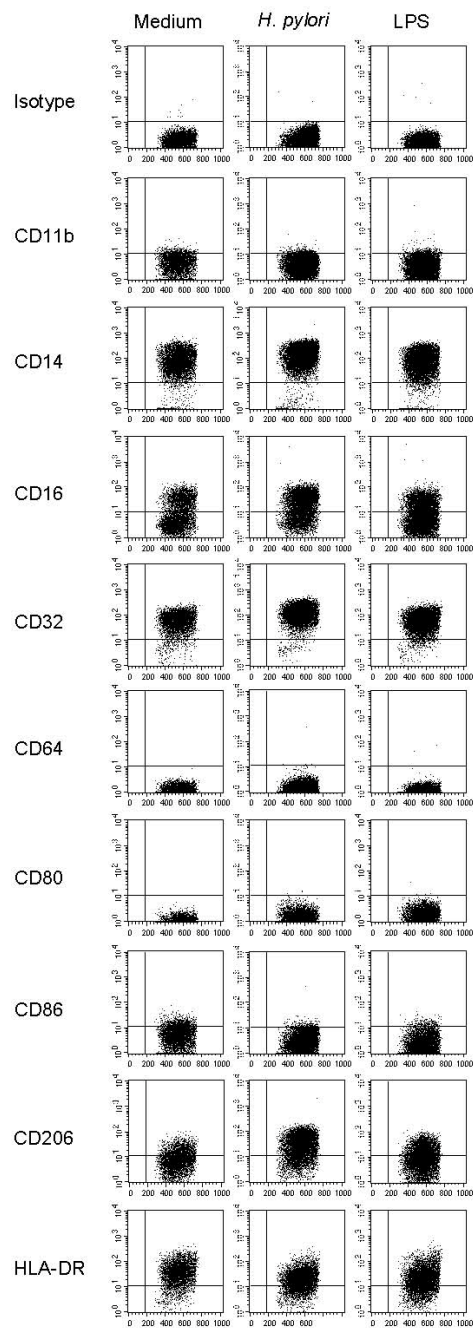

M2 macrophages were infected with *H. pylori* for 1 h (MOI =10). Cells were washed, incubated for another 24 h, and surface molecule expression was determined by flow cytometry. Cells incubated in the presence of LPS (100 ng/ml) or in medium alone served as controls. One representative of at least five independent experiments (donors) is shown.
